# Supplementary material for: Effects of TRAM-34 and minocycline on neuroinflammation caused by diabetic ketoacidosis in a rat model
Source: PubMed Central journal article supplement — BMJ Open Diabetes Res Care. 2022 May 18;10(3):e002777. doi: 10.1136/bmjdrc-2022-002777 (PMC9119135; doi:10.1136/bmjdrc-2022-002777), 2022-05-18
Supplement: bmjdrc-2022-002777supp001.pdf [file bmjdrc-2022-002777supp001.pdf]

**Supplemental Figure 1. Serum levels of inflammatory mediators in adult diabetic rats with and without exposure to DKA as juveniles** (HG= hyperglycemic control, DKA = DKA treated with insulin/saline, DKA-M = DKA treated with insulin/saline plus Minocycline, DKA-T = DKA treated with insulin/saline plus TRAM-34)

## Supplemental Figure 1.

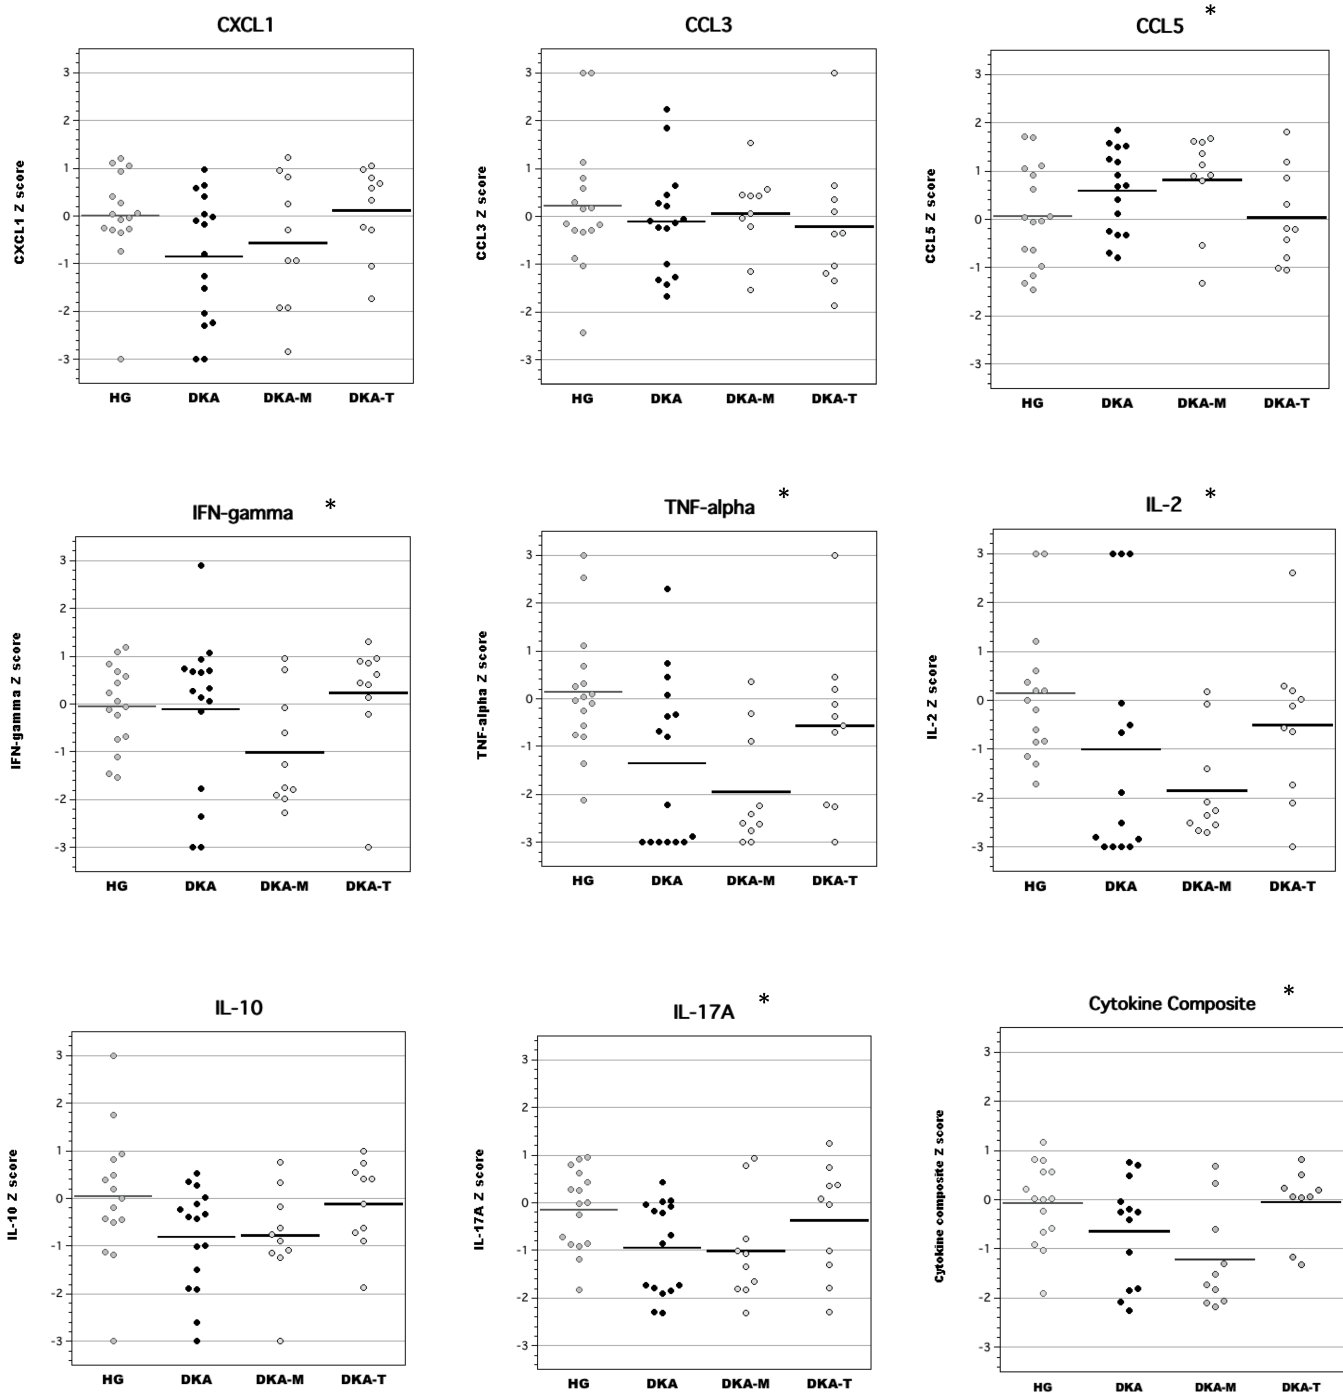

\*Minocycline group significantly different from HG control group (mean difference (95% CI), p-value)

CCL-5 0.86 (0.10, 1.62), p=0.03

IFN $\gamma$  -1.04 (-1.84, -0.24), p=0.01

TNF $\alpha$  -1.89 (-2.78, -0.99), p<0.001

IL-2 -1.77 (-2.65, -0.88), p<0.001

IL-17A -0.81 (-1.57, -0.04), p=0.04

cytokine composite -1.15 (-1.89, -0.42), p=0.002
